# Supplementary material
Source: HighWire-hosted journal article supplement (https://bmjopen.bmj.com/content/11/2/e038191)
Supplement: inline-supplementary-material-4 [file inline-supplementary-material-4.pdf]

## Annexure 4

## Study Outcomes in APMU Program, Andhra Pradesh (2019-2020)

| Cost Category                                      |                                   | MMU                         |                            |                     |                    |
|----------------------------------------------------|-----------------------------------|-----------------------------|----------------------------|---------------------|--------------------|
|                                                    |                                   | Financial Cost in INR (USD) | Economic Cost in INR (USD) | Financial Cost in % | Economic Cost in % |
| <b>Capital</b>                                     |                                   |                             |                            |                     |                    |
| Building (Regional, district level offices)        |                                   |                             |                            |                     |                    |
| Equipment                                          | Medical (stethoscope, hammer etc) |                             |                            |                     |                    |
|                                                    | Non Medical (MMU, Lap top etc)    |                             |                            |                     |                    |
| <b>Total Capital Costs</b>                         |                                   |                             |                            |                     |                    |
| <b>Recurrent</b>                                   |                                   |                             |                            |                     |                    |
| Personnel                                          |                                   |                             |                            |                     |                    |
| Drugs                                              |                                   |                             |                            |                     |                    |
| Supplies (including Lab Reagents and Testing Kits) |                                   |                             |                            |                     |                    |
| Overheads (diesel, maintenances etc)               |                                   |                             |                            |                     |                    |
| <b>Total Recurrent Costs</b>                       |                                   |                             |                            |                     |                    |
| <b>Grand Total Cost</b>                            |                                   |                             |                            |                     |                    |

Once we have above details, then we will adopt step down methodology for cost allocation.

## Disease wise Cost per unit of Output in APMU, 2020.

| Services                 | MMU services            |                          |                        | Out put unit                                    |
|--------------------------|-------------------------|--------------------------|------------------------|-------------------------------------------------|
|                          | Total cost in INR (USD) | Output (number of cases) | Unit cost in INR (USD) | Unit cost in INR (USD)                          |
| General medicine         |                         |                          |                        | Cost per general medicine case serviced         |
| Gynaecology & obstetrics |                         |                          |                        | Cost per Gynaecology & obstetrics case serviced |
| Paediatrics              |                         |                          |                        | Cost per paediatrics case serviced              |

A table below specifies the above three treatment groups

| Serial number | Disease category | Disease Name |
|---------------|------------------|--------------|
|---------------|------------------|--------------|

|          |                  |                                                                                                                                                                                                                                                                        |
|----------|------------------|------------------------------------------------------------------------------------------------------------------------------------------------------------------------------------------------------------------------------------------------------------------------|
| <b>1</b> | General Medicine | Hypertension<br>Diabetes Mellitus<br>Tuberculosis<br>Common cough and cold<br>Diarrhea<br>Dysentery<br>Anemia<br>Arthritis<br>Peptic ulcers<br>Skin Infection<br>Epilepsy<br>Anxiety<br>General weakness and Vitamin Deficiency<br>General fever with multiple reasons |
| <b>2</b> | Gynecology       | Ante natal care, Post natal care, Menopause and other female related disorder treatable at Primary level                                                                                                                                                               |
| <b>3</b> | Pediatrics       | Pediatric patients of various ailments like fever, diarrhea, dysentery, Anemia etc                                                                                                                                                                                     |
